1        **Shrinking of the endangered brown bear *Ursus arctos* distribution in the**  
2                    **French Pyrenees revealed by dynamic occupancy modeling**

3    Blaise Piédallu (1, 2)

4    Pierre-Yves Quenette (3, 4)

5    Nicolas Bombillon (3, 5)

6    Adrienne Gastineau (3, 6)

7    Christian Miquel (7, 8)

8    Olivier Gimenez (1, 9) – Corresponding author

9    (1) CEFE, CNRS UMR 5175, Université de Montpellier, Université Paul-Valéry Montpellier,  
10        EPHE, 1919 Route de Mende, 34293 Montpellier Cedex 5, France

11    (2) [blaise.piedallu@cefe.cnrs.fr](mailto:blaise.piedallu@cefe.cnrs.fr)

12    (3) Office National de la Chasse et de la Faune Sauvage, CNERA PAD-Equipe Ours, Impasse  
13        de la Chapelle, 31800 Villeneuve-de-Rivière, France

14    (4) [pierre-yves.quenette@oncfs.gouv.fr](mailto:pierre-yves.quenette@oncfs.gouv.fr)

15    (5) [nicolas.bombillon@oncfs.gouv.fr](mailto:nicolas.bombillon@oncfs.gouv.fr)

16    (6) [adrienne.gastineau@oncfs.gouv.fr](mailto:adrienne.gastineau@oncfs.gouv.fr)

17    (7) Laboratoire d'Ecologie Alpine, CNRS UMR 5553, Université Joseph Fourier, BP 53, F-  
18        38041 Grenoble Cedex 9, France

19    (8) [christian.miquel@ujf-grenoble.fr](mailto:christian.miquel@ujf-grenoble.fr)

20    (9) [olivier.gimenez@cefe.cnrs.fr](mailto:olivier.gimenez@cefe.cnrs.fr)

21

22    **Word count: 5815**

23

24 **Abstract**

25 The Pyrenean brown bear (*Ursus arctos*) in the mountainous border between France and  
26 Spain is one of the smallest and most endangered populations of large carnivores in Europe.  
27 Here, we aimed at assessing trends in brown bear distribution in the Pyrenees and determining  
28 the underlying environmental and anthropogenic drivers. Using detection/non-detection data  
29 collected between 2008 and 2014 through non-invasive methods, we developed occupancy  
30 models to investigate the dynamic of brown bear distribution in the Pyrenees through local  
31 colonization and extinction processes. Our results showed a negative correlation between  
32 human density and bear occupancy in agreement with previous studies on brown bear habitat  
33 suitability. We found two non-connected occupancy cores, one located in the West and  
34 another in the Center of the Pyrenees. Importantly, we showed that the population distribution  
35 significantly decreased between 2008 and 2014, and that while bear went locally extinct in  
36 some areas, there was no sign of colonization of new ones.

37 **Keywords:** dynamic occupancy model, extinction, imperfect species detection, large  
38 carnivores, local extinction, species distribution, *Ursus arctos*

39

40

## 41 **Introduction**

42 Over the last decades, large carnivore populations have been recovering in Europe following  
43 the implementation of conservation policies (Chapron *et al.*, 2014). Among the four species in  
44 continental Europe is the brown bear *Ursus arctos*, which is widely distributed all over the  
45 continent and split in numerous populations of varying sizes and ranges (Swenson, Taberlet  
46 and Bellemain, 2011), including the large Swedish population (Kindberg *et al.*, 2011) or the  
47 much smaller one living in the Italian Apennines (Gervasi *et al.*, 2012). One of the smallest  
48 and most endangered of these populations resides in the Pyrenees mountains between  
49 Southwestern France and Northeastern Spain and is considered to be critically endangered by  
50 the IUCN (Huber, 2007). Its survival required the translocation of Slovenian individuals in  
51 1996-97 and 2006 after only five individuals were detected in 1995, and it remains to this day  
52 small and threatened by demographic stochasticity and inbreeding (Chapron *et al.*, 2009,  
53 Swenson *et al.*, 2011).

54 Despite the recovery of European large carnivores, conflicts surrounding the animals'  
55 presence subsist (Treves and Karanth, 2003). More than the direct danger caused by carnivore  
56 presence, the main sources of conflicts are the damage on livestock and the competition with  
57 local hunters (Ericsson and Heberlein, 2003, Gunther *et al.*, 2004, Piédallu *et al.*, 2016a). For  
58 these conflicts to be solved or at least mitigated - a necessary step in the conservation of wild  
59 populations - the expectations of all stakeholders should be considered and the management  
60 decisions rely on solid ecological data (Redpath *et al.*, 2013).

61 The distribution of a wild population is a key element on which the IUCN relies to determine  
62 its conservation status (IUCN, 2012). However, this state variable is difficult to assess in the  
63 case of elusive species with large home ranges (Gittleman and Harvey, 1982), brown bear

64 making no exception, and requires their monitoring to rely on tracks and indirect observations  
65 coupled with DNA analyses to identify the individuals (e.g., Bellemain *et al.*, 2005,  
66 McDonald, 2004, Taberlet *et al.*, 1997). In the case of the French brown bear, its actual  
67 distribution remains poorly studied. Martin *et al.* (2012) conducted a habitat suitability  
68 analysis on the Cantabrian brown bear population in Spain and transferred their results using  
69 presence data in the Pyrenees. Here, we intend to build on these results to address two main  
70 issues in standard species distribution models.

71 First, when dealing with free-ranging populations, species detectability is most likely less than  
72 1, which can lead to false negatives where animals are present but not seen during the survey  
73 (Kéry, 2011). Falsely assuming perfect detection can lead to an underestimation of the actual  
74 species distribution (Lahoz-Monfort, Guillera-Arroita and Wintle, 2014), which in turn can  
75 have negative effects on the resolution of a conflict by generating distrust among stakeholders  
76 (Redpath *et al.*, 2013). Site-occupancy models were specifically developed to explicitly  
77 disentangle a non-detection from an actual absence through the modeling of the imperfect,  
78 possibly heterogeneous, observation process (MacKenzie *et al.*, 2002). Second, another limit  
79 of standard species distribution models is the assumption that the species always occupy the  
80 most favorable area, and that dispersal allows reaching these ideal territories - both statements  
81 originating from the ecological niche concept (Leibold, 1995). However, natural barriers or  
82 dispersal limitations (such as being an extremely small population) may prevent a species  
83 from reaching a favorable area (Araújo and Guisan, 2006). To address this issue, static  
84 occupancy models were extended to account for colonization and extinction processes – so-  
85 called dynamic or multi-season occupancy models (MacKenzie *et al.*, 2003). Although static  
86 occupancy models have often been used on large carnivores (e.g., Bayne, Boutin and Moses,  
87 2008, Carroll and Miquelle, 2006, Carroll *et al.*, 2003, Hines *et al.*, 2010), there are only few  
88 applications of dynamic occupancy models (Miller *et al.*, 2013, Molinari-Jobin *et al.*, 2012).

89 In this study, besides identifying environmental or anthropogenic drivers of brown bear  
90 distribution in the French Pyrenees, we aimed at assessing trends in its range dynamics. To do  
91 so, we fitted a dynamic occupancy model on detection/non-detection data obtained through a  
92 multi-source systematic monitoring protocol between 2008 and 2014.

## 93 **Material & Methods**

### 94 1. Study area and bear population

95 This study was performed on the French side of the Pyrenees at the border between  
96 Northeastern Spain and Southwestern France (Figure 1). The bears that live here mostly  
97 descend from individuals that were translocated from Slovenia to the Pyrenees in 1996-1997  
98 (2 females and 1 male) and 2006 (4 females and 1 male), even though one bear's mother  
99 belonged to the remnant of the original Pyrenean bear population which was thought to  
100 include 5 individuals in 1995. Field observations suggest that two population cores exist on  
101 the French side of the Pyrenees: the Western one is made of two male bears, and the Central  
102 one accounts for the rest of the population. The Western core is located on two French  
103 counties: the Southeast of the Pyrénées-Atlantiques, and the Southwest of the Hautes-  
104 Pyrénées. The Central core, meanwhile, is currently located on the Southeast of the Haute-  
105 Garonne county and the Southwest of the Ariège county, but until 2011 also extended on the  
106 Southeast of Ariège and the Southwest of the Aude and Pyrénées-Orientales counties (Figure  
107 1).

### 108 2. Bear data collection and monitoring

109 The data used for this analysis was gathered between 2008 and 2014 by members of the  
110 national Brown Bear Network (135 professional members from government agencies and 228  
111 unaffiliated amateur members) under the supervision of the French Game and Wildlife  
112 Agency (ONCFS). A systematic monitoring protocol was followed using fixed itineraries

113 along which the agents looked for bear tracks such as hair, scats, claw marks or paw prints.  
114 The Pyrenees were broken down in mountain massif subsections using ridge lines and the  
115 bottom of valleys. Each one of the 84 investigated subsections of the mountain massif  
116 included one itinerary, which could either be active or inactive each year. An itinerary was  
117 assigned the inactive status after three years without any track discovered in the  
118 corresponding subsection. Active itineraries were visited at least once every month from July  
119 to November. Tracks and observations were validated by ONCFS experts, therefore  
120 minimizing the risk of false positives due to species misidentification (Molinari-Jobin *et al.*,  
121 2012).

### 122 3. Model building and selection

123 To estimate the probability of bear presence in all the mountain massif subsections, we built a  
124 dynamic occupancy model (MacKenzie *et al.*, 2003) that was parameterized with the  
125 probabilities of colonization  $\gamma$  (the probability for a subsection to become occupied while it  
126 was unoccupied the year before), extinction  $\epsilon$  (the probability for a subsection to become  
127 unoccupied while it was occupied the year before) and initial occupancy  $\psi$  (the probability for  
128 a subsection to be occupied the first year of the study), along with the species detection  
129 probability  $p$  (the probability for a subsection to be seen as occupied when bears are present).  
130 The subsections itineraries were visited every month between July and November. We used  
131 years as primary occasions, between which colonization and extinction probabilities could be  
132 estimated, and the months of July to November as secondary occasions during which we  
133 considered the subsections' occupancy status to remain unchanged (the so-called closure  
134 assumption). By focusing on the July-November period, we excluded the reproduction season  
135 (April to June) during which male bears in particular are known to increase their movement  
136 range while they look for females (Clevenger, Purroy and Pelton, 1990). Despite this

137 precaution, movements may still occur, and occupancy should be interpreted as use of the  
138 subsections rather than the proportion of area occupied by the species (MacKenzie and  
139 Nichols, 2004).

140 We relied on previous habitat suitability studies on brown bears in Europe to select candidate  
141 environmental and anthropogenic covariates for our analysis (Martin *et al.*, 2010, Martin *et*  
142 *al.*, 2012, Mertzanis *et al.*, 2008). We considered eight environmental and anthropogenic  
143 covariates for each mountain massif subsection (Table 1). We used the IGN BD\_ALTI®  
144 database (250m resolution) to calculate the mean altitude of each massif subsection (ALT).  
145 Roughness was obtained as the mean of the absolute differences between the altitude of a  
146 massif subsection and the value of its contiguous mountain subsections (Wilson *et al.*, 2007).  
147 Forest cover and shrub cover covariates were extracted from the CORINE Land Cover®  
148 database (U.E – SoeS. Corine Land Cover 2012). Road length was built using the IGN  
149 ROUTE 500® database. Human density was obtained from the NASA Socioeconomic data  
150 and applications center ([http://sedac.ciesin.columbia.edu/data/set/gpw-v3-population-](http://sedac.ciesin.columbia.edu/data/set/gpw-v3-population-count/data-download)  
151 [count/data-download](http://sedac.ciesin.columbia.edu/data/set/gpw-v3-population-count/data-download)). Lastly, we followed Martin *et al.* (2012) and included an index of  
152 forest connectivity that was built for each massif subsection as the average proportion of  
153 forest cover in the contiguous massif subsections. We also considered an index of human  
154 diffusion calculated for each massif subsection as the average human population in the  
155 contiguous massif subsections.

156 Due to the large number of covariate combinations, we used a multi-stage approach to model  
157 selection (Dugger, Anthony and Andrews, 2011, Lee and Bond, 2015, MacKenzie *et al.*,  
158 2012). We used Akaike's Information Criterion corrected for sample size (AICc, Burnham  
159 and Anderson (2002)) to rank models at each stage. The covariates were standardized prior to  
160 the analyses. Model selection proceeded as follows:

161 (1) We started by selecting the best model structure by focusing on time-varying  
162 covariates only, namely *year* and *survey*. We considered 8 different models in total,  
163 with either no effect (.) or a *year* effect on colonization  $\gamma$  and extinction  $\epsilon$ , and either  
164 no effect (.) or a *survey* effect on detection probability  $p$  (Table 2). Because the  
165 sampling effort was homogeneous over the study period, we did not consider a *year*  
166 effect on detection.

167 (2) Based on previous bear occupancy studies (Martin *et al.*, 2010, Martin *et al.*, 2012,  
168 Mertzanis *et al.*, 2011, Nielsen *et al.*, 2010, Nielsen, Stenhouse and Boyce, 2006) and  
169 bear biology, we considered specific combinations of the environmental or  
170 anthropogenic effects on each of the parameters ( $\psi$ ,  $\gamma$ ,  $\epsilon$  and  $p$ , Table 1). We  
171 investigated possible negative effects of covariates human density and road length on  
172 initial occupancy  $\psi$  as a previous study showed that bears avoided human-caused  
173 disturbances (Martin *et al.*, 2010, Mertzanis *et al.*, 2011, Naves *et al.*, 2003). Altitude,  
174 roughness, shrub cover and forest cover were all positively associated with bear  
175 presence albeit performed at different scales in previous studies (Apps *et al.*, 2004,  
176 Martin *et al.*, 2010, Martin *et al.*, 2012, Naves *et al.*, 2003, Nellemann *et al.*, 2007).  
177 For colonization  $\gamma$ , we studied a possible effect of forest connectivity, using it as a  
178 possible indicator of landscape fragmentation which was shown to influence mammal  
179 distribution (Crooks, 2002), along with possible effects of roughness and human  
180 density, which were the most commonly significant covariates in previous bear  
181 distribution studies (Martin *et al.*, 2010). We considered for extinction  $\epsilon$  the possible  
182 effect of the three anthropogenic covariates human density, road length and human  
183 diffusion. Finally, we tested the possible effect of roughness and forest cover on  
184 detection  $p$  as both could potentially influence the accessibility of bear tracks to  
185 observers.



186 (3) We sequentially fitted a set of models, using a focal parameter for which we selected  
187 the best model among all different covariates combinations while the other parameters  
188 were held constant. Once the main effect was determined for a parameter, we fitted the  
189 best model for the next focal parameter. We repeated those steps until no better model  
190 was selected on all four parameters. Focal parameters were selected in the following  
191 order: detection  $p$ , colonization  $\gamma$ , extinction  $\epsilon$  then initial occupancy  $\psi$ .

192 To assess a trend over the years in occupancy, we first estimated the posterior mean of  
193 occurrence at each subsection and for each year. We then tested a linear effect of year on  
194 occurrence using a conditional autoregressive correlation model and an adjacency matrix  
195 between the different subsections to specify the correlation matrix (Rousset and Ferdy, 2014).  
196 A likelihood ratio test (LRT) was performed to assess the significance of this temporal trend.  
197 These analyses were performed in R (RCoreTeam, 2013) with the ‘unmarked’ (Fiske and  
198 Chandler, 2011) and spaMM (Rousset and Ferdy, 2014) packages.

## 199 **Results**

### 200 1. Multi-stage model selection

201 The null model was selected during the first step, which means that we found no *year* or  
202 *survey* effects on any of the parameters  $\psi$ ,  $\gamma$ ,  $\epsilon$  or  $p$  (Table 2). The  $\Delta AICc$  of the next two best  
203 models (with a *year* effect on extinction  $\epsilon$  and a *survey* effect on detection  $p$  respectively) was  
204  $>2$ , therefore we used the null model as the basic structure for the next step. In the sequential  
205 model selection procedure with environmental and anthropogenic covariates, we found an  
206 effect of forest cover and roughness on detection probability, and effects of roughness on  
207 colonization  $\gamma$ , human diffusion on extinction  $\epsilon$  and human density on initial occupancy  
208  $\psi$  (Table 3).

209        2. The effect of covariates on parameters

210        Using the model best supported by the data, we investigated the relationships between the  
211        selected covariates and initial occupancy, colonization, extinction and detection probabilities,  
212        to assess the shape and intensity of the effects (Figure 2). Roughness was more influential on  
213        detection probability than forest cover (Figure 2A), with detection probability increasing with  
214        both covariates increasing. Initial occupancy  $\psi$  was strongly negatively correlated with human  
215        density (Figure 2B), with the least populated areas being much more likely to be occupied by  
216        bears, just like extinction  $\varepsilon$  was negatively correlated with human diffusion (Figure 2D).  
217        However, the link between roughness and colonization  $\gamma$  was weak, with only a slight increase  
218        of  $\gamma$  for the highest roughness values (Figure 2C).

219        3. Distribution maps

220        The initial occupancy map (Figure 3B) clearly showed two population cores (Western and  
221        Central), with the Central Core extending in Southeast Ariège and Southwest Aude and  
222        Pyrénées-Orientales (Figure 1). The extinction probability in the East of the Central core was  
223        high (Figure 3D), which is consistent with the disappearance of the bears from that area  
224        (Camarra *et al.*, 2012), while the colonization probability in the same mountain subsections  
225        were close to zero (Figure 3C). Detection was higher in the Central core than it was in the  
226        Western core (Figure 3A), which might be explained by the fact that the Central population  
227        core is much more populated than the Western one. The colonization map indicated that the  
228        Western population core was more likely to expand to the East, while the Central one was  
229        more likely to expand to the West (Figure 3C).

230        These last observations were confirmed by the yearly occupancy maps (Figure 4), which  
231        showed a strong decrease of the occupancy probability in the Eastern parts of the Central  
232        population core (Southeast Ariège, Southwest Aude and Pyrénées-Orientales). Occupancy in

233 the West of the Western population core (Southwest of the Pyrénées-Atlantiques) also  
234 decreased while it remained constant in the East of that core (Southeast of the Hautes-  
235 Pyrénées). Overall, a shrinking of the bear population distribution between 2008 and 2014  
236 was detected (slope = -0.011, standard error = 0.001,  $\chi^2 = 78.13$ , degree of freedom = 1, p-  
237 value  $\ll 0.01$ ), with no new areas being colonized while others clearly went extinct.

## 238 **Discussion**

### 239 1. Environmental and anthropogenic effects on model parameters

240 Human density had a strong, negative effect on occupancy probability  $\psi$ , with the least  
241 densely populated areas being the most likely to be used by bears. This result confirms  
242 previous analyses suggesting that bears tend to live far from the areas with the most intense  
243 human activity (Long *et al.*, 2010, Martin *et al.*, 2010). Several factors such as the habituation  
244 of the bears (Wheat and Wilmers, 2016) or the need for female bears to shield themselves  
245 from sexual conflict (Steyaert *et al.*, 2016) may mitigate this effect – but the small current size  
246 of the Pyrenean brown bear population limits the immediate relevance of these factors as  
247 bears tend to disperse further at low densities, lowering the encounter rate of other individuals  
248 and for females the risk of sexually selected infanticide (Stoen *et al.*, 2006).

249 Contrary to what we were expecting, human diffusion was negatively correlated with the  
250 probability of extinction. A possible explanation is the influence of demographic stochasticity  
251 in small populations (Gabriel and Bürger, 1992) which gives more weight to extinction  
252 events. In our study, human diffusion was lower in the Southeast of Ariège and Southwest of  
253 Aude and Pyrénées-Orientales (Figure A1) than it was in the other areas with high occupancy  
254 probability (Figure 3B), and was the place of several local extinction events in years 2010 and  
255 2011 (Camarra *et al.*, 2012). The effect of stochasticity might also explain the weak, positive

256 relationship between roughness and colonization, which seems to be driven by the effect of a  
257 very small number of subsections with very high values of the covariate (Figure 2C).

258 Finally, the positive correlation between the detection probability and both roughness and  
259 forest cover seems counter-intuitive, as we might think that bears are harder to spot in more  
260 densely forested areas with steeper slopes. However, this pattern may be explained by the  
261 characteristics of the monitoring, which was implemented a) through itineraries that used  
262 paths accessible to humans and b) through finding tracks that indirectly indicated bear  
263 presence instead of direct sightings and c) hair and camera traps being mostly installed in  
264 forested areas for practical reasons. Even though analyzing habitat preferences of animals at  
265 very fine scales is a difficult task (Johnson *et al.*, 2002), the paths used for systematic  
266 monitoring itineraries in rough and forested terrains are more likely to be used by bears as  
267 corridors (Graves *et al.*, 2007) due to a lack of other available options. Overall, species  
268 detection was imperfect and estimated below 0.6, therefore confirming the need to correct for  
269 it to avoid underestimating occupancy.

## 270 2. Brown bear distribution in the French Pyrenees

271 The occupancy maps for bears in the Pyrenees clearly showed the existence of two  
272 independent population cores, one located in the West and another in the Center of the  
273 Pyrenees (Figure 3B, Figure 4). The two cores remained unconnected during the timespan of  
274 the study. The dynamics of occupancy over the study period (Figure 4) showed that the  
275 population significantly shrunk overall. In particular, the extinction of the Eastern part of the  
276 Central core is consistent with the lack of bear tracks found in Southeast Ariège and  
277 Southwest Aude and Pyrénées-Orientales (Figure 1) since 2011 (Camarra *et al.*, 2012). These  
278 results demonstrate the usefulness of dynamic occupancy models to highlight trends in  
279 species distribution that cannot be identified by static models (MacKenzie *et al.*, 2003).

280 The negative correlation between human activity and bear presence was commonly found in  
281 previous studies (Apps *et al.*, 2004, Martin *et al.*, 2010, Martin *et al.*, 2012, Naves *et al.*,  
282 2003, Nellemann *et al.*, 2007), and was also observed in the Pyrenees. The effects of  
283 roughness and forest cover, which were the second most commonly present in literature, were  
284 not retained (Apps *et al.*, 2004, Martin *et al.*, 2012, Naves *et al.*, 2003, Nellemann *et al.*,  
285 2007), but roughness seemed to weakly affect colonization. These results confirm that  
286 anthropogenic effects supersede natural elements when it comes to habitat selection by brown  
287 bears (Nellemann *et al.*, 2007).

288 The fact that we found many mountain subsections with a high occupancy probability in the  
289 Western core despite the fact that only 2 to 3 bears were estimated to live there between 2008  
290 and 2014 (Piédallu *et al.*, 2016b) suggests a violation of the closure assumption between our  
291 secondary occasions (July-November), because there were not enough bears in the population  
292 core to occupy all subsections at the same time. This means that we estimated the use of space  
293 by brown bears instead of the actual occupancy. For species that can attack livestock,  
294 presence does not have to be permanent to be a source of conflict, and therefore space use  
295 remains a relevant indicator in the case of large carnivores often characterized by their vast  
296 home ranges (Gittleman and Harvey, 1982) and their use of large areas without actually  
297 occupying much land at any given time.

### 298 3. Implications for human-wildlife conflict mitigation

299 We anticipate that our results will be useful as part of the “scientific evidence gathering” that  
300 is required for conflict mitigation (Redpath *et al.*, 2013). Attacks on livestock are one of the  
301 main causes of the negative attitudes towards carnivore presence in general (Kaczensky,  
302 Blazic and Gossow, 2004, Sponarski *et al.*, 2013) and towards brown bears in the Pyrenees in  
303 particular (Piédallu *et al.*, 2016a). There is an interest in mapping the areas which are more

304 likely to host bears in the present and the future, and as such the “attack hotspots” (Miller,  
305 2015). It could also be combined with a mapping of attitudes towards brown bears (Piédallu *et*  
306 *al.*, 2016a) to identify areas that combine positive attitudes towards bear presence and low  
307 attack risk, and as such could be primary targets of future management decisions. This might  
308 be the first step towards the development of socio-ecological models designed to mitigate  
309 human-wildlife conflicts (Aswani, 2011, Dupont *et al.*, 2011, Estoque and Murayama, 2014).

310

### 311 **Acknowledgments**

312 We are grateful to the volunteers of the Brown Bear Network and the ONCFS Bear Team for  
313 collecting and sharing precious data and knowledge on the Pyrenean brown bears.

314

### 315 **References**

- 316 Apps, C. D., McLellan, B. N., Woods, J. G., Proctor, M. F. (2004). Estimating grizzly bear  
317 distribution and abundance relative to habitat and human influence. *Journal of Wildlife*  
318 *Management* 68, 138-152.
- 319 Araújo, M. B. , Guisan, A. (2006). Five (or so) challenges for species distribution modelling.  
320 *Journal of Biogeography* 33, 1677-1688.
- 321 Aswani, S. (2011). Socioecological approaches for combining ecosystem-based and  
322 customary management in Oceania. *Journal of Marine Biology* 2011, 1-13.
- 323 Bayne, E. M., Boutin, S., Moses, R. A. (2008). Ecological factors influencing the spatial  
324 pattern of Canada lynx relative to its southern range edge in Alberta, Canada.  
325 *Canadian Journal of Zoology* 86, 1189-1197.

- 326 Bellemain, E., Swenson, J. E., Tallmon, D., Brunberg, S., Taberlet, P. (2005). Estimating  
327 population size of elusive animals with DNA from hunter-collected feces: Four  
328 methods for brown bears. *Conservation Biology* 19, 150-161.
- 329 Burnham, K. P. Anderson, D. R. (2002). Model selection and multimodel inference: A  
330 practical information-theoretic approach, 2nd edition. New York: Springer-Verlag.
- 331 Camarra, J. J., Sentilles, J., Bombillon, N., Quenette, P. Y. (2012). Suivi de l'ours brun dans  
332 les Pyrénées françaises. Rapport annuel. Office National de la Chasse et de la Faune  
333 Sauvage. URL: [http://www.oncfs.gouv.fr/IMG/pdf/Rapport\\_du\\_Reseau\\_Ours\\_Brun\\_2012-](http://www.oncfs.gouv.fr/IMG/pdf/Rapport_du_Reseau_Ours_Brun_2012-2.pdf)  
334 [2.pdf](http://www.oncfs.gouv.fr/IMG/pdf/Rapport_du_Reseau_Ours_Brun_2012-2.pdf). Last accessed September 16, 2016.
- 335 Carroll, C., Miquelle, D. G. (2006). Spatial viability analysis of Amur tiger *panthera tigris*  
336 *altaica* in the Russian Far East: The role of protected areas and landscape matrix in  
337 population persistence. *Journal of Applied Ecology* 43, 1056-1068.
- 338 Carroll, C., Phillips, M. K., Schumaker, N. H., Smith, D. W. (2003). Impacts of landscape  
339 change on wolf restoration success: Planning a reintroduction program based on static  
340 and dynamic spatial models. *Conservation Biology* 17, 536-548.
- 341 Chapron, G., Kaczensky, P., Linnell, J. D. C., von Arx, M., Huber, D., Andren, H., Lopez-  
342 Bao, J. V., Adamec, M., Alvares, F., Anders, O., Balciauskas, L., Balys, V., Bedo, P.,  
343 Bego, F., Blanco, J. C., Breitenmoser, U., Broseth, H., Bufka, L., Bunikyte, R., Ciucci,  
344 P., Dutsov, A., Engleder, T., Fuxjager, C., Groff, C., Holmala, K., Hoxha, B.,  
345 Iliopoulos, Y., Ionescu, O., Jeremic, J., Jerina, K., Kluth, G., Knauer, F., Kojola, I.,  
346 Kos, I., Krofel, M., Kubala, J., Kunovac, S., Kusak, J., Kutal, M., Liberg, O., Majic,  
347 A., Mannil, P., Manz, R., Marboutin, E., Marucco, F., Melovski, D., Mersini, K.,  
348 Mertzanis, Y., Myslajek, R. W., Nowak, S., Odden, J., Ozolins, J., Palomero, G.,  
349 Paunovic, M., Persson, J., Potocnik, H., Quenette, P. Y., Rauer, G., Reinhardt, I.,  
350 Rigg, R., Ryser, A., Salvatori, V., Skrbinek, T., Stojanov, A., Swenson, J. E.,

- 351 Szemethy, L., Trajce, A., Tsingarska-Sedefcheva, E., Vana, M., Veeroja, R.,  
352 Wabakken, P., Wofl, M., Wolf, S., Zimmermann, F., Zlatanova, D. , Boitani, L.  
353 (2014). Recovery of large carnivores in Europe's modern human-dominated  
354 landscapes. *Science* 346, 1517-1519.
- 355 Chapron, G., Wielgus, R., Quenette, P. Y. , Camarra, J. J. (2009). Diagnosing mechanisms of  
356 decline and planning for recovery of an endangered brown bear (*Ursus arctos*)  
357 population. *PloS one* 4, e7568.
- 358 Clevenger, A. P., Purroy, F. J. , Pelton, M. R. (1990). Movement and activity patterns of a  
359 European brown bear in the Cantabrian Mountains, Spain. *Int. Conf. Bear Res. and*  
360 *Manage.* 8, 205-211.
- 361 Crooks, K. R. (2002). Relative sensitivities of mammalian carnivores to habitat  
362 fragmentation. *Conservation Biology* 16, 488-502.
- 363 Dugger, K. M., Anthony, R. G. , Andrews, L. S. (2011). Transient dynamics of invasive  
364 competition: Barred Owls, Spotted Owls, habitat, and the demons of competition  
365 present. *Ecological Applications* 21, 2459-2468.
- 366 Dupont, H., Mihoub, J. B., Becu, N. , Sarrazin, F. (2011). Modelling interactions between  
367 scavenger behaviour and farming practices: Impacts on scavenger population and  
368 ecosystem service efficiency. *Ecological Modelling* 222, 982-992.
- 369 Ericsson, G. , Heberlein, T. A. (2003). Attitudes of hunters, locals, and the general public in  
370 sweden now that the wolves are back. *Biological Conservation* 111, 149-159.
- 371 Estoque, R. C., Murayama, Y. (2014). Social–ecological status index: A preliminary study of  
372 its structural composition and application. *Ecological Indicators* 43, 183-194.
- 373 Fiske, I., Chandler, R. (2011). Unmarked: An R package for fitting hierarchical models of  
374 wildlife occurrence and abundance. *Journal of Statistical Software* 43, 1-23.



- 375 Gabriel, W., Bürger, R. (1992). Survival of small populations under demographic  
376 stochasticity. *Theoretical Population Biology* 41, 44-71.
- 377 Gervasi, V., Ciucci, P., Boulanger, J., Randi, E., Boitani, L. (2012). A multiple data source  
378 approach to improve abundance estimates of small populations: The brown bear in the  
379 Apennines, Italy. *Biological Conservation* 152, 10-20.
- 380 Gittleman, J. L., Harvey, P. H. (1982). Carnivore home-range size, metabolic needs and  
381 ecology. *Behavioral Ecology and Sociobiology* 10, 57-63.
- 382 Graves, T. A., Farley, S., Goldstein, M. I. , Servheen, C. (2007). Identification of functional  
383 corridors with movement characteristics of brown bears on the Kenai Peninsula,  
384 Alaska. *Landscape Ecology* 22, 765-772.
- 385 Gunther, K. A., Haroldson, M. A., Frey, K., Cain, S. L., Copeland, J. (2004). Grizzly bear-  
386 human conflicts in the Greater Yellowstone ecosystem, 1992-2000. *Ursus* 15, 10-22.
- 387 Hines, J. E., Nichols, J. D., Royle, J. A., MacKenzie, D. I., Gopalaswamy, A. M., Samba  
388 Kumar, N. , Karanth, K. U. (2010). Tigers on trails: Occupancy modeling for cluster  
389 sampling. *Ecological Applications* 10, 1456-1466.
- 390 Huber, D. (2007). *Ursus arctos* - The IUCN Red List of threatened species.  
391 <http://www.iucnredlist.org/details/41688/1>. Last accessed September 16, 2016.
- 392 Johnson, C. J., Parker, K. L., Heard, D. C., Gillingham, M. P. (2002). Movement parameters  
393 of ungulates and scale-specific responses to the environment. *Journal of Animal*  
394 *Ecology* 71, 225-235.
- 395 Kaczensky, P., Blazic, M. , Gossow, H. (2004). Public attitudes towards brown bears (*Ursus*  
396 *arctos*) in Slovenia. *Biological Conservation* 118, 661-674.
- 397 Kéry, M. (2011). Towards the modelling of true species distributions. *Journal of*  
398 *Biogeography* 38, 617-618.

- 399 Kindberg, J., Swenson, J. E., Ericsson, G., Bellemain, E., Miquel, C., Taberlet, P. (2011).  
400 Estimating population size and trends of the Swedish brown bear *Ursus arctos*  
401 population. *Wildlife Biology* 17, 114-123.
- 402 Lahoz-Monfort, J. J., Guillera-Arroita, G., Wintle, B. A. (2014). Imperfect detection impacts  
403 the performance of species distribution models. *Global Ecology and Biogeography* 23,  
404 504-515.
- 405 Lee, D. E., Bond, M. L. (2015). Previous year's reproductive state affects Spotted Owl site  
406 occupancy and reproduction responses to natural and anthropogenic disturbances. *The*  
407 *Condor* 117, 307-319.
- 408 Leibold, M. A. (1995). The niche concept revisited: Mechanistic models and community  
409 context. *Ecology* 76, 1371-1382.
- 410 Long, R. A., Donovan, T. M., MacKay, P., Zielinski, W. J., Buzas, J. S. (2010). Predicting  
411 carnivore occurrence with noninvasive surveys and occupancy modeling. *Landscape*  
412 *Ecology* 26, 327-340.
- 413 MacKenzie, D. I., Nichols, J. D., Lachman, G. B., Droege, S., Royle, J. A., Langtimm, C. A.  
414 (2002). Estimating site occupancy rates when detection probabilities are less than one.  
415 *Ecology* 83, 2348-2355.
- 416 MacKenzie, D. I., Nichols, J. D., Hines, J. E., Knutson, M. G., Franklin, A. B. (2003).  
417 Estimating site occupancy, colonization, and local extinction when a species is  
418 detected imperfectly. *Ecology* 84, 2200-2207.
- 419 MacKenzie, D. I., Nichols, J. D. (2004). Occupancy as a surrogate for abundance estimation.  
420 *Animal Biodiversity and Conservation* 27, 461-467.
- 421 MacKenzie, D. I., Seamans, M. E., Gutiérrez, R. J., Nichols, J. D. (2012). Investigating the  
422 population dynamics of California Spotted Owls without marked individuals. *Journal*  
423 *of Ornithology* 152, 597-604.

- 424 Martin, J., Basille, M., Van Moorter, B., Kindberg, J., Allainé, D., Swenson, J. E. (2010).  
425 Coping with human disturbance: Spatial and temporal tactics of the brown bear (*Ursus*  
426 *arctos*). *Canadian Journal of Zoology* 88, 875-883.
- 427 Martin, J., Revilla, E., Quenette, P.-Y., Naves, J., Allainé, D., Swenson, J. E. (2012). Brown  
428 bear habitat suitability in the Pyrenees: Transferability across sites and linking scales  
429 to make the most of scarce data. *Journal of Applied Ecology*, 49, 621-631.
- 430 McDonald, L. L. (2004). Sampling rare populations. In *Sampling rare and elusive species*:  
431 11-42. Thompson, W. L. (Ed.). Washington, DC: Island Press.
- 432 Mertzanis, G., Kallimanis, A.S., Kanellopoulos, N., Sgardelis, S.P., Tragos, A., Aravidis, I.  
433 (2008). Brown bear (*Ursus arctos*) habitat use patterns in two regions of northern  
434 Pindos, Greece – management implications. *Journal of Natural History*, 42, 301–315.
- 435 Miller, D. A., Nichols, J. D., Gude, J. A., Rich, L. N., Podruzny, K. M., Hines, J. E. ,  
436 Mitchell, M. S. (2013). Determining occurrence dynamics when false positives occur:  
437 Estimating the range dynamics of wolves from public survey data. *PloS one* 8,  
438 e65808.
- 439 Miller, J. R. B. (2015). Mapping attack hotspots to mitigate human–carnivore conflict:  
440 Approaches and applications of spatial predation risk modeling. *Biodiversity and*  
441 *Conservation* 24, 2887-2911.
- 442 Molinari-Jobin, A., Kéry, M., Marboutin, E., Molinari, P., Koren, I., Fuxjäger, C.,  
443 Breitenmoser-Würsten, C., Wöfl, S., Fasel, M., Kos, I., Wöfl, M., Breitenmoser, U.,  
444 Gompper, M. , Ewers, R. (2012). Monitoring in the presence of species  
445 misidentification: The case of the Eurasian lynx in the Alps. *Animal Conservation* 15,  
446 266-273.

- 447 Naves, J., Wiegand, T., Revilla, E., Delibes, M. (2003). Endangered species constrained by  
448 natural and human factors: The case of brown bears in northern Spain. *Conservation*  
449 *Biology* 17, 1276-1289.
- 450 Nellemann, C., Støen, O.-G., Kindberg, J., Swenson, J. E., Vistnes, I., Ericsson, G., Katajisto,  
451 J., Kaltenborn, B. P., Martin, J., Ordiz, A. (2007). Terrain use by an expanding brown  
452 bear population in relation to age, recreational resorts and human settlements.  
453 *Biological Conservation* 138, 157-165.
- 454 Nielsen, S. E., McDermid, G., Stenhouse, G. B., Boyce, M. S. (2010). Dynamic wildlife  
455 habitat models: Seasonal foods and mortality risk predict occupancy-abundance and  
456 habitat selection in grizzly bears. *Biological Conservation* 143, 1623-1634.
- 457 Nielsen, S. E., Stenhouse, G. B., Boyce, M. S. (2006). A habitat-based framework for grizzly  
458 bear conservation in Alberta. *Biological Conservation* 130, 217-229.
- 459 Piédallu, B., Quenette, P.-Y., Mounet, C., Lescureux, N., Borelli-Massines, M., Dubarry, E.,  
460 Camarra, J.-J., Gimenez, O. (2016a). Spatial variation in public attitudes towards  
461 brown bears in the French Pyrenees. *Biological Conservation* 197, 90-97.
- 462 Piédallu, B., Quenette, P. Y., Afonso, I., Bombillon, N., Gastineau, A., Jato, R., Miquel, C.,  
463 Muñoz, P., Palazón, S., Solà de la Torre, J., Gimenez, O. (2016b). Better together: A  
464 transboundary approach to brown bear monitoring in the pyrenees. Submitted to  
465 *Biodiversity and Conservation*. Preprint available from BioRxiv  
466 [biorxiv.org/content/early/2016/09/16/075663](http://biorxiv.org/content/early/2016/09/16/075663); doi: <http://dx.doi.org/10.1101/075663>.
- 467 RCoreTeam (2013). R: A language and environment for statistical computing.): R Foundation  
468 for Statistical Computing.
- 469 Redpath, S. M., Young, J., Evely, A., Adams, W. M., Sutherland, W. J., Whitehouse, A.,  
470 Amar, A., Lambert, R. A., Linnell, J. D., Watt, A., Gutierrez, R. J. (2013).

- 471           Understanding and managing conservation conflicts. *Trends in Ecology & Evolution*  
472           28, 100-109.
- 473   Rousset, F. , Ferdy, J.-B. (2014). Testing environmental and genetic effects in the presence of  
474           spatial autocorrelation. *Ecography* 37, 781-790.
- 475   Sponarski, C. C., Semeniuk, C., Glikman, J. A., Bath, A. J. , Musiani, M. (2013).  
476           Heterogeneity among rural resident attitudes toward wolves. *Human Dimensions of*  
477           *Wildlife* 18, 239-248.
- 478   Steyaert, S. M., Leclerc, M., Pelletier, F., Kindberg, J., Brunberg, S., Swenson, J. E.,  
479           Zedrosser, A. (2016). Human shields mediate sexual conflict in a top predator.  
480           *Proceedings of the Royal Society B: Biological Sciences* 283, 1833.
- 481   Stoen, O. G., Zedrosser, A., Saebo, S., Swenson, J. E. (2006). Inversely density-dependent  
482           natal dispersal in brown bears *Ursus arctos*. *Oecologia* 148, 356-364.
- 483   Swenson, J. E., Taberlet, P. , Bellemain, E. (2011). Genetics and conservation of european  
484           brown bears *Ursus arctos*. *Mammal Review* 41, 87-98.
- 485   Taberlet, P., Camarra, J. J., Griffin, S., Uhrès, E., Hanotte, O., Waits, L. P., Dubois-Paganon,  
486           C., Burke, T. , Bouvet, J. (1997). Noninvasive genetic tracking of the endangered  
487           Pyrenean brown bear population. *Molecular Ecology* 6, 869-876.
- 488   Treves, A. , Karanth, K. U. (2003). Human-carnivore conflict and perspectives on carnivore  
489           management worldwide. *Conservation Biology* 17, 1491-1499.
- 490   Wheat, R. E. , Wilmers, C. C. (2016). Habituation reverses fear- based ecological effects in  
491           brown bears (*Ursus arctos*). *Ecosphere* 7.
- 492   Wilson, M. F. J., O'Connell, B., Brown, C., Guinan, J. C., Grehan, A. J. (2007). Multiscale  
493           terrain analysis of multibeam bathymetry data for habitat mapping on the continental  
494           slope. *Marine Geodesy* 30, 3-35.
- 495

496

497 **Author contributions** Conceived and designed the experiments: BP, PYQ, OG. Performed  
498 the experiments: BP, NB, AG, CM, PYQ. Analyzed the data: BP, OG. Contributed  
499 reagents/materials/analysis tools: BP, PYQ, NB, AG, CM, OG. Wrote the paper: BP, PYQ,  
500 OG.

501

502 **Biographical sketches** Blaise Piédallu is a population ecologist interested in human-wildlife  
503 conflicts with a focus on large carnivores. Pierre-Yves Quenette is an ecologist who leads the  
504 ONCFS brown bear program. Nicolas Bombillon is an ecologist interested in wildlife  
505 conservation. Adrienne Gastineau is an ecologist interested in the behavior of large  
506 carnivores. Christian Miquel is a population geneticist interested in promoting non-invasive  
507 monitoring methods. Olivier Gimenez is a biostatistician interested in population dynamics of  
508 large carnivores.

509

510

511

512 **Tables & Figures**

513 **Table 1:** Definition of the environmental variables used for the occupancy analysis, and the  
 514 parameters for which an effect was tested.  $\psi$ : initial occupancy probability,  $\gamma$ : colonization  
 515 probability,  $\epsilon$ : extinction probability,  $p$ : detection probability. +/-: predicted sign of the effect  
 516 of the covariate on the parameter based on previous studies (see text for references). An  
 517 absence of a +/- sign means that the effect was not tested.

| Variable name       | Description                                                                              | $\psi$ | $\gamma$ | $\epsilon$ | $p$ |
|---------------------|------------------------------------------------------------------------------------------|--------|----------|------------|-----|
| Altitude            | Mean altitude                                                                            | +      |          |            |     |
| Roughness           | Mean of the difference between the altitude of a cell and those of all surrounding cells | +      | +        |            | -   |
| Forest cover        | Percentage of forest cover                                                               | +      | +        |            | -   |
| Shrub cover         | Percentage of shrub cover                                                                | +      |          |            |     |
| Forest connectivity | Average percentage of forest cover in all bordering subsections                          |        | +        |            |     |
| Road length         | Total length of roads                                                                    | -      |          | +          |     |
| Human density       | Average human density                                                                    | -      | -        | +          |     |
| Human diffusion     | Average human density in all bordering subsections                                       |        |          | +          |     |

518

519

520 **Table 2:** Model selection with time-varying covariates. Models were ranked with AICc.  $\psi$ :  
521 initial occupancy probability,  $\gamma$ : colonization probability,  $\epsilon$ : extinction probability,  $p$ :  
522 detection probability. *year*: year effect on the parameter, which relates to changes between  
523 primary occasions, i.e. from one year to another in our case. *survey*: survey effect on the  
524 parameter, which relates to the secondary occasions repeated within a year.  $\Delta$ AICc: difference  
525 between the AICc of the current model and the AICc of the model with lowest AICc.

| # | Model                                                                          | AICc  | $\Delta$ AICc |
|---|--------------------------------------------------------------------------------|-------|---------------|
| 1 | $\psi(\cdot) \gamma(\cdot) \epsilon(\cdot) p(\cdot)$                           | 577.1 | 0             |
| 2 | $\psi(\cdot) \gamma(\cdot) \epsilon(\textit{year}) p(\cdot)$                   | 581.0 | 3.9           |
| 3 | $\psi(\cdot) \gamma(\cdot) \epsilon(\cdot) p(\textit{survey})$                 | 581.8 | 4.7           |
| 4 | $\psi(\cdot) \gamma(\cdot) \epsilon(\textit{year}) p(\textit{survey})$         | 584.5 | 7.4           |
| 5 | $\psi(\cdot) \gamma(\textit{year}) \epsilon(\cdot) p(\cdot)$                   | 584.5 | 7.4           |
| 6 | $\psi(\cdot) \gamma(\textit{year}) \epsilon(\cdot) p(\textit{survey})$         | 588.0 | 10.9          |
| 7 | $\psi(\cdot) \gamma(\textit{year}) \epsilon(\textit{year}) p(\cdot)$           | 588.8 | 11.7          |
| 8 | $\psi(\cdot) \gamma(\textit{year}) \epsilon(\textit{year}) p(\textit{survey})$ | 592.3 | 15.2          |

526



527

528 **Table 3:** Model selection with environmental and anthropogenic covariates. The starting  
 529 model was the null model  $\{\psi(\cdot), \gamma(\cdot), \epsilon(\cdot), p(\cdot)\}$  as shown in Table 2. The focal parameters are  
 530 shown in the order in which they were considered during the model selection process. The  
 531 covariates that were considered for each parameter are defined in Table 1. # models: number  
 532 of models considered, equal to  $2^n$  with  $n$  the number of covariates tested on that parameter.  
 533 Best models: Among the # models we considered for selection, we only displayed the model  
 534 with lowest AICc for a given focal parameter.

| Focal parameter                            | # models | Best models                                                                                                                | AICc                                      |
|--------------------------------------------|----------|----------------------------------------------------------------------------------------------------------------------------|-------------------------------------------|
| Detection<br>probability $p$               | 4        | $\psi(\cdot), \gamma(\cdot), \epsilon(\cdot), p(\text{roughness+forest cover})$                                            | $\square \tilde{\square} \square$         |
| Colonization<br>probability $\gamma$       | 16       | $\psi(\cdot), \gamma(\text{roughness}), \epsilon(\cdot), p(\text{roughness+forest cover})$                                 | $\square \square \tilde{\square} \square$ |
| Extinction<br>probability $\epsilon$       | 8        | $\psi(\cdot), \gamma(\text{roughness}), \epsilon(\text{HDF}), p(\text{roughness+forest cover})$                            | $\square \square \tilde{\square} \square$ |
| Initial<br>occupancy<br>probability $\psi$ | 64       | $\psi(\text{human density}), \gamma(\text{roughness}), \epsilon(\text{human diffusion}), p(\text{roughness+forest cover})$ | $\square \square \tilde{\square}$         |

535

536

537

538

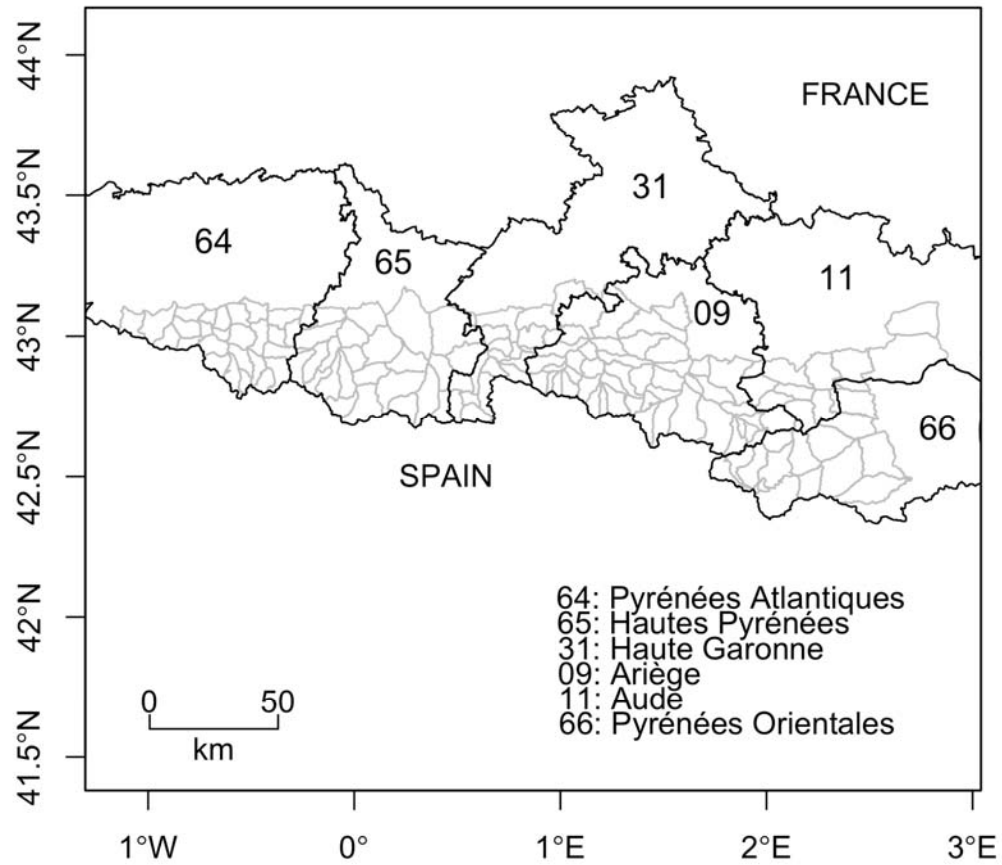

539

540 **Figure 1:** Map of the counties and mountain subsections in the French Pyrenees. Dark lines:  
541 county borders. Gray lines: limits between mountain subsections.

542

543

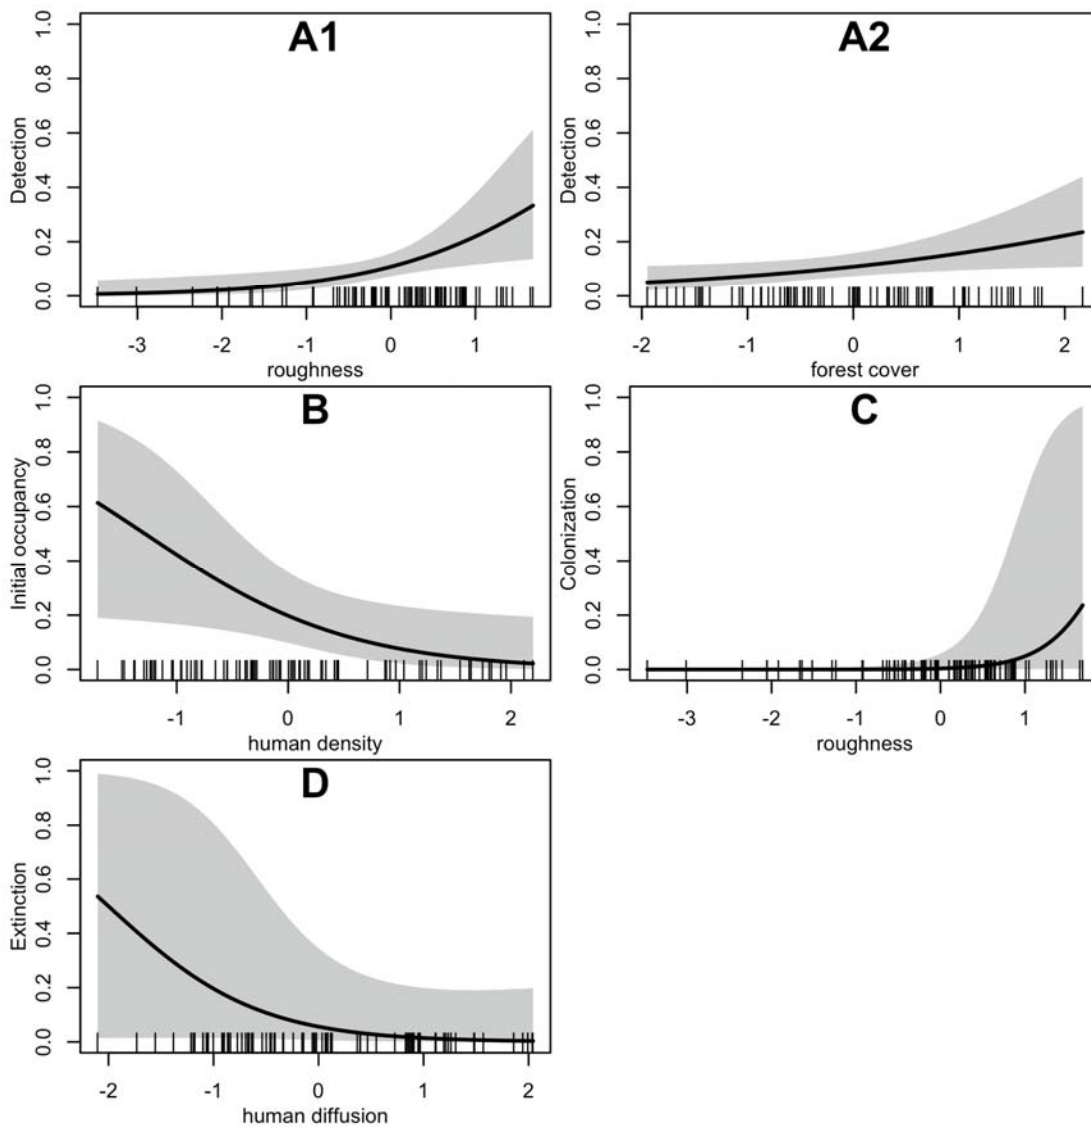

544

545 **Figure 2:** Relationships between the model parameters and the standardized covariates  
546 selected in the best model  $\{\psi(\text{human density}), \gamma(\text{roughness}), \varepsilon(\text{human diffusion}),$   
547  $p(\text{roughness+forest cover})\}$ . The dashes on the x-axis indicate the observed covariate values.  
548 A: Detection  $p$ , with A1: detection as a function of roughness (forest cover set at its mean)  
549 and A2: detection as a function of forest cover (roughness set at its mean). B: Initial  
550 occupancy  $\psi$  as a function of human density. C: Colonization  $\gamma$  as a function of roughness. D:  
551 Extinction  $\varepsilon$  as a function of human diffusion.

552

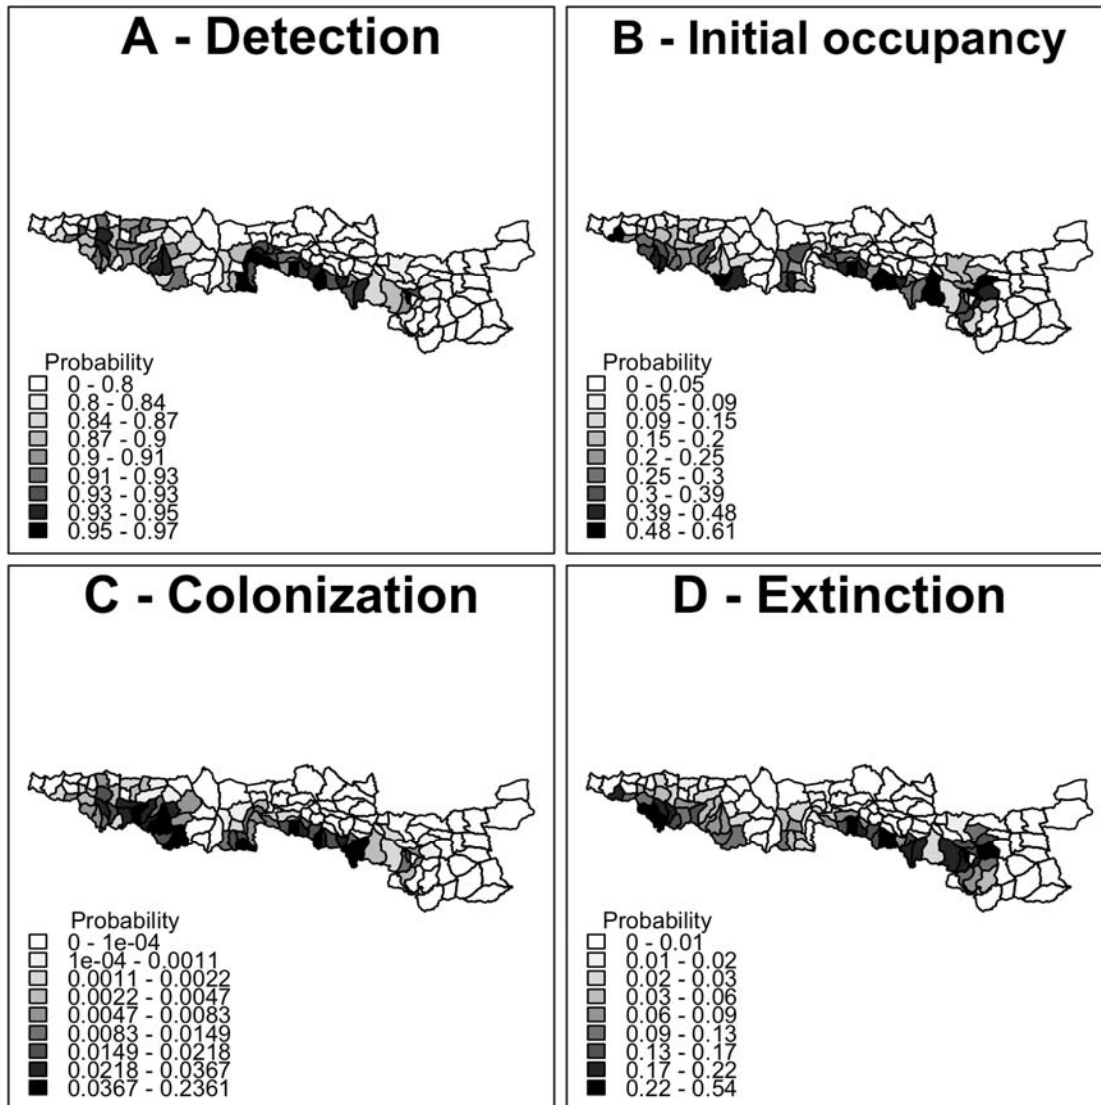

553

554 **Figure 3:** Maps of the model parameters in the various mountain subsections of the French  
555 Pyrenees, estimated using the results obtained from the best model  $\{\psi(\text{human}$   
556 density),  $\gamma(\text{roughness})$ ,  $\epsilon(\text{human diffusion})$ ,  $p(\text{roughness}+\text{forest cover})\}$ . A: Detection  
557 probability, B: Initial occupancy probability, C: Colonization probability, D: Extinction  
558 probability. Covariates were set at their mean.

559

560

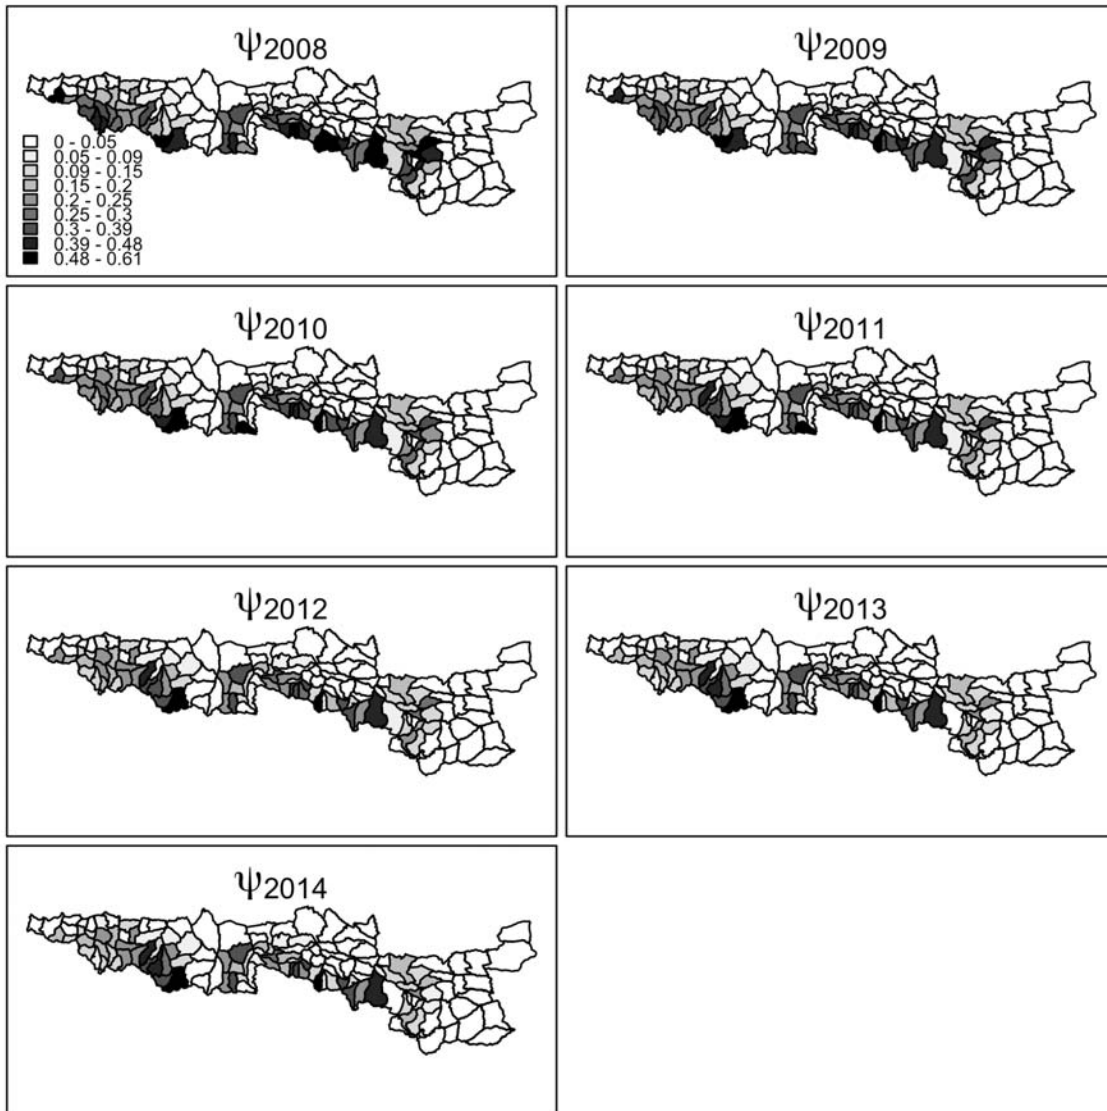

561

562 **Figure 4:** Maps of the yearly occupancy probability  $\psi_t$  from  $t = 2008$  to  $t = 2014$  in the  
563 various mountain subsections of the French Pyrenees, estimated using the results obtained  
564 from the best model  $\{\psi(\text{human density}), \gamma(\text{roughness}), \epsilon(\text{human diffusion}),$   
565  $\rho(\text{roughness}+\text{forest cover})\}$  by using the formula  $\psi_{t+1} = (1-\psi_t) \gamma + \psi_t (1-\epsilon)$  (MacKenzie *et al.*,  
566 2002). Covariates were set at their mean.
